# Supplementary material for: A simple scheme for finding magnetic aromatic hydrocarbon molecules
Source: Royal Society of Chemistry journal article supplement (doi:10.1039/c9cp06065k), 2020-01-01

## SUPPLEMENTARY MATERIAL (2) FOR 'SECOND ORDER PERTURBATION THEORY TO DETERMINE THE MAGNETIC STATE OF FINITE SIZE AROMATIC HYDROCARBONS MOLECULES'

### 1 to set the number of azulene oligomers at the system

Nsit defines the number of atoms at the system

```
-> NumberOfOligomers: 2 $ Nsit : 10 + ( NumberOfOligomers - 1)*8; t: 1.$
```

18

### 2 to create a matrix, OliMatrix, for the non interacting Hamiltonian

```
-> modulo( a, b ) :=a - b*floor( a/b )$
```

```
-> OliMatrix:zeromatrix(Nsit, Nsit) $
```

```
-> for i: 1 thru Nsit do for j: 1 thru Nsit do if i-j = 1 and modulo(i,8)=7 then  
OliMatrix[i,j]:-t else if i-j = -1 and modulo(i,8) = 1 then OliMatrix[i,j]:-t else if  
i-j = 2 then OliMatrix[i,j]:-t;
```

```
-> auxMat:OliMatrix + transpose(OliMatrix)$ OliMatrix:auxMat$
```

### 3 compute the eigenvalues and eigenvectors of the unperturbed system

```
-> load (lapack)$
```

```
-> eigenSys: dgeev ( OliMatrix ,True)$
```

```
-> eigenvalues: eigenSys[1]$
```

```
-> eigenvectors: transpose ( eigenSys[2] ) $
```

## 4 Tight-binding calculation for the electronic density of the non-perturbed system

-> orderedeigenvalues : sort (eigenvalues) \$

**FermiGround defines the Fermi level, FermiP1 and FeermiM1 set the electronic filling for first excited state**

-> FermiGround : orderedeigenvalues[Nsit/2]; FermiP1 : orderedeigenvalues[Nsit/2 + 1]\$ FermiM1 : orderedeigenvalues[Nsit/2 - 1]\$

-> sitedensity (i, FermiLevel) := sum ( if eigenvalues[j] <= FermiLevel then eigenvectors[j][i]^2 else 0, j, 1, Nsit)\$

-> density : makelist ( [ i , 2. \* sitedensity(i,FermiGround) ] , i, Nsit)\$

**densDn and densUp compute respectively the density of electrons with spin up and down**

-> densDn : makelist ([ i , sitedensity(i,FermiM1)], i, Nsit)\$ densUp : makelist ([ i , sitedensity(i,FermiP1)], i, Nsit)\$

**densUpDnMs0 is density of electrons with spin up and down computed on Ms = 0 spin projections sub - spaces**

-> densUpDnMs0 : makelist ( sitedensity(i,FermiGround)\*sitedensity(i,FermiGround), i, Nsit)\$

**densUpDnMs1 is density of electrons with spin up and down computed on Ms = 1 spin projections sub - spaces**

-> densUpDnMs1 : makelist ( sitedensity(i,FermiP1)\*sitedensity(i,FermiM1), i, Nsit)\$

## 5 energies of the unperturbed system on Ms = 0 and Ms=1 spin projections sub - spaces

-> energyMs0 : 2. \* sum ( if eigenvalues[j] <= FermiGround then eigenvalues[j] else 0, j, 1, Nsit);

*-24.52188174203637*

-> energyMs1 : energyMs0 + FermiP1 -FermiGround;

*-24.01615315026958*

## 6 First-Order Perturbation Theory for the Hubbard model on Ms=0 and Ms=1 spin projections sub-spaces

Eq.(7) at SUPPLEMENTARY MATERIAL (1) computed on Ms=0 spin projections sub-spaces

$$\begin{aligned} \rightarrow \quad \text{alfaMs0} &: \text{sum} ( \text{densUpDnMs0}[i], i, 1, \text{Nsit} ) - \text{Nsit}/2.; \\ & -4.449986242244303 \end{aligned}$$

Eq.(7) at SUPPLEMENTARY MATERIAL (1) computed on Ms=1 spin projections sub-spaces

$$\begin{aligned} \rightarrow \quad \text{alfaMs1} &: \text{sum} ( \text{densUpDnMs1}[i], i, 1, \text{Nsit} ) - \text{Nsit}/2.; \\ & -4.557368647201192 \end{aligned}$$

Uc is the critical value of the electronic correlation for First-Order Perturbation Theory

$$\begin{aligned} \rightarrow \quad \text{float} ( \text{solve} ( [ \text{Uc} * ( \text{alfaMs1} - \text{alfaMs0} ) - ( \text{energyMs1} - \text{energyMs0} ) ], [\text{Uc}] ) ); \\ [ \text{Uc} = -4.709603886873415 ] \end{aligned}$$

## 7 Second-Order Perturbation Theory for the Hubbard model on Ms=0 spin projections sub-space

SumBB is the numerator in Eq.(17) at supplementary material (1)

$$\begin{aligned} \rightarrow \quad \text{SumBB} ( \text{ppu}, \text{pu}, \text{ppd}, \text{pd} ) &:= \text{if eigenvalues}[\text{ppu}] \leq \text{FermiGround} \text{ and eigenvalues}[\text{pu}] > \text{FermiGround} \text{ and eigenvalues}[\text{ppd}] \leq \text{FermiGround} \text{ and eigenvalues}[\text{pd}] > \text{FermiGround} \text{ then sum} ( \text{eigenvectors}[\text{ppu}][j] * \text{eigenvectors}[\text{pu}][j] * \text{eigenvectors}[\text{ppd}][j] * \text{eigenvectors}[\text{pd}][j] , j, 1, \text{Nsit} ) \text{ else } 0\$ \end{aligned}$$

**SumBB is the denominator in Eq.(17) at supplementary material (1)**

-> DeltaE (ppu, pu, ppd, pd) := if eigenvalues[ppu] <= FermiGround and eigenvalues[pu] > FermiGround and eigenvalues[ppd] <= FermiGround and eigenvalues[pd] > FermiGround then eigenvalues[pu] + eigenvalues[pd] - eigenvalues[ppu] - eigenvalues[ppd] else 10000 \$

**To build a table, TableBBEner, for the fraction at Eq.(17 )**

-> array (TableBBEner, flonum, Nsit, Nsit, Nsit, Nsit,2);  
-> for ppu: 1 thru Nsit do for pu: 1 thru Nsit do for ppd: 1 thru Nsit do for pd: 1 thru Nsit do TableBBEner[ppu,pu,ppd,pd,1]:SumBB(ppu, pu, ppd, pd)^2\$  
-> for ppu: 1 thru Nsit do for pu: 1 thru Nsit do for ppd: 1 thru Nsit do for pd: 1 thru Nsit do TableBBEner[ppu,pu,ppd,pd,2]:DeltaE(ppu, pu, ppd, pd)\$

**Eq.(17) at supplementary material (1)**

-> beta0 : sum ( sum ( sum ( sum ( TableBBEner[ppu,pu,ppd,pd,1]/ TableBBEner[ppu,pu,ppd,pd,2], pd,1,Nsit) , ppd,1,Nsit), pu,1,Nsit) , ppu,1,Nsit)\$

**DeltaEUp is the denominator in Eq.(18) at supplementary material (1)**

-> DeltaEUp (ppu, pu) := if eigenvalues[ppu] <= FermiGround and eigenvalues[pu] > FermiGround then eigenvalues[pu] - eigenvalues[ppu] else 10000\$

**SumBBNd is the numerator in Eq.(18) at supplementary material(1)**

-> SumBBNd (ppu,pu) := if eigenvalues[ppu] <= FermiGround and eigenvalues[pu] > FermiGround then sum ( eigenvectors[ppu][j]\*eigenvectors[pu][j]\* 1./2. \* density[j][2] , j, 1, Nsit) else 0\$

**To build a table, TableBUNdEner, for the fraction at Eq.(18)**

-> array (TableBUNdEner, flonum, Nsit, Nsit,2)\$  
-> for ppu: 1 thru Nsit do for pu: 1 thru Nsit do TableBUNdEner[ppu,pu,1] : SumBBNd(ppu,pu)^2;  
-> for ppu: 1 thru Nsit do for pu: 1 thru Nsit do TableBUNdEner[ppu,pu,2] : DeltaEUp(ppu, pu);

**Eq.(18) at supplementary material (1)**

-> betaUp : sum ( sum ( TableBUNdEner[ppu,pu,1]/ TableBUNdEner[ppu,pu,2], pu,1,Nsit) , ppu,1,Nsit)\$

**Eq.(8) at SUPPLEMENTARY MATERIAL (1) computed on Ms=0 spin projections sub-spaces**

-> betaMs0 : (beta0+2\*betaUp);

*0.28447881854422*

**EnergyU2Ms0 is the energy of the system computed at Ms = 0 spin projections sub - spaces by using second-order perturbation theory**

-> U : 1.0\$

-> energyU2Ms0 : energyMs0+ alfaMs0\*U-(betaMs0)\*U^2;

*-29.25634680282489*

## 8 Second-Order Perturbation Theory for the Hubbard model on Ms=1 spin projections sub-space

**SumBB is the numerator in Eq.(17) at supplementary material (1)**

-> SumBB (ppu,pu,ppd,pd) := if eigenvalues[ppu] <= FermiP1 and eigenvalues[pu] > FermiP1 and eigenvalues[ppd] < FermiGround and eigenvalues[pd] >= FermiGround then sum ( eigenvectors[ppu][j] \* eigenvectors[pu][j] \* eigenvectors[ppd][j] \* eigenvectors[pd][j] , j, 1, Nsit) else 0\$

**SumBB is the denominator in Eq.(17) at supplementary material (1)**

-> DeltaE (ppu, pu, ppd, pd) := if eigenvalues[ppu] <= FermiP1 and eigenvalues[pu] > FermiP1 and eigenvalues[ppd] < FermiGround and eigenvalues[pd] >= FermiGround then eigenvalues[pu] + eigenvalues[pd] - eigenvalues[ppu] - eigenvalues[ppd] else 10000\$

**To build a table, TableBBEner, for the fraction at Eq.(17)**

-> array (TableBBEner, flonum, Nsit, Nsit, Nsit, Nsit,2)\$

-> for ppu: 1 thru Nsit do for pu: 1 thru Nsit do for ppd: 1 thru Nsit do for pd: 1 thru Nsit do TableBBEner[ppu,pu,ppd,pd,1]:SumBB(ppu, pu, ppd, pd)^2;

-> for ppu: 1 thru Nsit do for pu: 1 thru Nsit do for ppd: 1 thru Nsit do for pd: 1 thru Nsit do TableBBEner[ppu,pu,ppd,pd,2]:DeltaE(ppu, pu, ppd, pd);

**Eq.(17) at supplementary material (1)**

-> beta0 : sum ( sum ( sum ( sum ( TableBBEner[ppu,pu,ppd,pd,1]/TableBBEner[ppu,pu,ppd,pd,2], pd,1,Nsit) , ppd,1,Nsit), pu,1,Nsit) , ppu,1,Nsit);

**SumBB is the denominator in Eq.(18) at supplementary material (1)**

-> DeltaEUp (ppu, pu) := if eigenvalues[ppu] <= FermiP1 and eigenvalues[pu] > FermiP1 then eigenvalues[pu] - eigenvalues[ppu] else 10000\$

**SumBB is the numerator in Eq.(18) at supplementary material (1)**

-> SumBBNd (ppu,pu) := if eigenvalues[ppu] <= FermiP1 and eigenvalues[pu] > FermiP1 then sum ( eigenvectors[ppu][j]\*eigenvectors[pu][j]\*densDn[j][2] , j, 1, Nsit) else 0\$

**To build a table, TableBUNdEner, for the fraction at Eq.(18 )**

-> array (TableBUNdEner, flonum, Nsit, Nsit,2);  
-> for ppu: 1 thru Nsit do for pu: 1 thru Nsit do TableBUNdEner[ppu,pu,1]:SumBBNd(ppu,pu)^2;  
-> for ppu: 1 thru Nsit do for pu: 1 thru Nsit do TableBUNdEner[ppu,pu,2]:DeltaEUp(ppu, pu);

**Eq.(18) at supplementary material (1)**

-> betaUp : sum ( sum ( TableBUNdEner[ppu,pu,1]/ TableBUNdEner[ppu,pu,2], pu,1,Nsit) , ppu,1,Nsit);

**SumBB is the denominator in Eq.(19) at supplementary material (1)**

-> DeltaEdown (ppd, pd) := if eigenvalues[ppd] < FermiGround and eigenvalues[pd] >= FermiGround then eigenvalues[pd] - eigenvalues[ppd] else 10000\$

**SumBB is the numerator in Eq.(19) at supplementary material (1)**

-> SumBBNu (ppd,pd) := if eigenvalues[ppd] < FermiGround and eigenvalues[pd] >= FermiGround then sum ( eigenvectors[ppd][j]\*eigenvectors[pd][j]\*densUp[j][2] , j, 1, Nsit) else 0\$

**To build a table, TableBUNuEner, for the fraction at Eq.(19)**

-> array (TableBUNuEner, flonum, Nsit, Nsit,2)\$  
-> for ppd: 1 thru Nsit do for pd: 1 thru Nsit do TableBUNuEner[ppd,pd,1]:SumBBNu(ppd,pd)^2;  
-> for ppd: 1 thru Nsit do for pd: 1 thru Nsit do TableBUNuEner[ppd,pd,2]:DeltaEdown(ppd, pd);

**Eq.(19) at supplementary material (1)**

-> betaDn : sum ( sum ( TableBUNuEner[ppd,pd,1]/ TableBUNuEner[ppd,pd,2], pd,1,Nsit) , ppd,1,Nsit)\$

**Eq.(8) at SUPPLEMENTARY MATERIAL (1) computed on Ms=1 spin projections sub-spaces**

-> betaMs1 : (beta0+betaUp+betaDn);

0.27116767746926

**EnergyU2Ms1** is the energy of the system computed at  $M_s = 1$  spin projections sub - spaces by using second-order perturbation theory

```
-> U : 1.0$
-> energyU2Ms1 : energyMs1+ alfaMs1*U-(betaMs1)*U*U;
                -28.84468947494004
```

## 9 Uc calculations for second-order Perturbation theory

**Uc** is the critical value of the electronic correlation **U** obtained with Second-Order Perturbation Theory

```
-> float ( solve ( [ - (betaMs1 - betaMs0) * Uc^2 + ( alfaMs1 - alfaMs0 ) * Uc2
+ (energyMs1 - energyMs0)], [Uc2] ) );
```

$$[Uc2 = -5.151482932300986 \cdot 10^{-23} (9.047547750388563 \cdot 10^{22} \%i - 7.829888526956168 \cdot 10^{22})]$$

$$Uc2 = 5.151482932300986 \cdot 10^{-23} (9.047547750388563 \cdot 10^{22} \%i + 7.829888526956167 \cdot 10^{22})]$$

```
-> wxplot2d([-( betaMs1 - betaMs0 ) * x^2 + ( alfaMs1 - alfaMs0 ) * x + (energyMs1 - energyMs0) ], [x,0,5], [y,0,0.5], [box, false], [label, ["x", 5.2, 0], ["Spin Gap", -1.6, .3 ] ] )$
```

plot2d: some values were clipped.

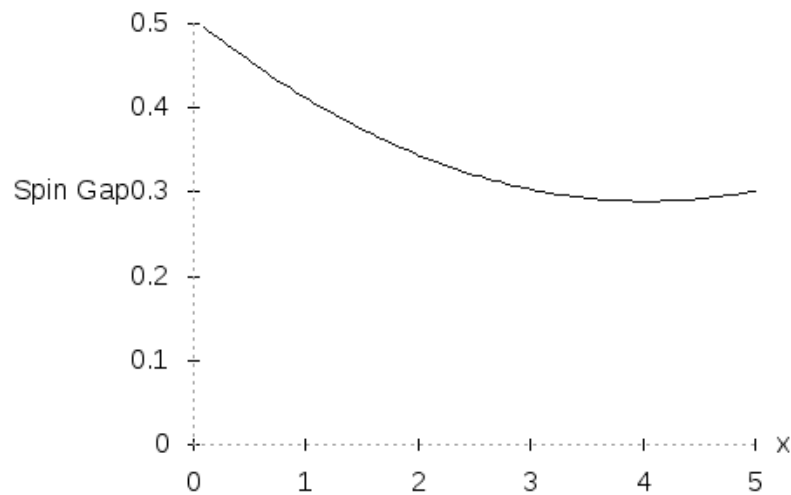

Supplement: c9cp06065k2.pdf [file c9cp06065k2.pdf]
