# Supplementary material for: A simple scheme for finding magnetic aromatic hydrocarbon molecules
Source: Royal Society of Chemistry journal article supplement (doi:10.1039/c9cp06065k), 2020-01-01
Supplement: c9cp06065k1.pdf [file c9cp06065k1.pdf]

**SUPPLEMENTARY MATERIAL (1) FOR “A SIMPLE SCHEME FOR FINDING  
MAGNETIC AROMATIC HYDROCARBON MOLECULES”**

Usually first- and second-order Rayleigh-Schrödinger perturbation theory is used in condensed matter starting from the large interaction limit where the kinetic energy is used as a perturbation[1]. In this appendix we show how to treat the electronic repulsion as a weak perturbation (the general formalism is exposed in refs. 2 and 3).

On the main text we use the Hubbard model[4] to describe the electronic interactions in conjugated systems. The model Hamiltonian contains a non-interacting part  $\hat{H}_0$  and a term that incorporates the on-site electron-electron interaction  $\hat{H}_1$ :

$$\hat{H} = \hat{H}_0 + \hat{H}_1. \quad (1)$$

The non-interacting part is a tight-binding Hamiltonian,

$$\hat{H}_0 = -t \sum_{i,j;\sigma} \left( \hat{c}_{i\sigma}^\dagger \hat{c}_{j\sigma} + \hat{c}_{j\sigma}^\dagger \hat{c}_{i\sigma} \right), \quad (2)$$

that describe the kinetic energy with a constant hopping  $t$  between sites  $i$  and  $j$ . The interacting part of  $\hat{H}$  is

$$\hat{H}_1 = U \sum_{i=1}^N (\hat{n}_{i\uparrow} - 1/2)(\hat{n}_{i\downarrow} - 1/2), \quad (3)$$

where  $U$  is the on-site Coulomb interaction and  $N$  denote the number of sites.  $N_{e,\sigma}$  is the number of electrons with spin  $\sigma$  in the system.

Let us call  $\hat{c}_{p\sigma}$  the operators that diagonalize  $\hat{H}_0$ . The original annihilation site operators are written as a linear combination of these operators as

$$\hat{c}_{i\sigma} = \sum_{p'} \beta_{p'\sigma,i} \hat{c}_{p'\sigma}. \quad (4)$$

In the limit of weakly correlated electrons we treat the interaction as a small perturbation in the total energy. The energy of a state can be written as  $E = E^{(0)} + \lambda\alpha + \lambda^2\beta + O(\lambda^3)$  where  $\lambda = U/t$ . The energy for the unperturbed system is simply the energy of a tight-binding model

$$E^{(0)} = \langle n^{(0)} | \hat{H}_0 | n^{(0)} \rangle, \quad (5)$$

where

$$|n^{(0)}\rangle = \prod_{p_\uparrow \in S_{n,\uparrow}, p_\downarrow \in S_{n,\downarrow}} \hat{c}_{p_\downarrow}^\dagger \hat{c}_{p_\uparrow}^\dagger |0\rangle \quad (6)$$

is a state of the unperturbed system, which can easily be obtained once  $\hat{H}_0$  is exactly diagonalizable.  $S_{n,\sigma}$  is a set of eigenstates of  $\hat{H}_0$  labelled by  $p\sigma$  ( $\sigma = \uparrow, \downarrow$ ) with energy  $\varepsilon_{p\sigma}$ .

The first-order Rayleigh-Schrödinger perturbation theory correction for the energy is

$$\lambda\alpha = \langle n^{(0)} | \hat{H}_1 | n^{(0)} \rangle. \quad (7)$$

The Rayleigh-Schrödinger second-order perturbation term at non-degenerate state  $|n^{(0)}\rangle$  is

$$\lambda^2\beta = \sum_{k \neq n} \frac{|\langle n^{(0)} | \hat{H}_1 | k^{(0)} \rangle|^2}{E_n^{(0)} - E_k^{(0)}}, \quad (8)$$

where  $|k^{(0)}\rangle \neq |n^{(0)}\rangle$  is a state of the unperturbed system. The diagonal part of  $\hat{H}_1$ , proportional to the constant term  $-U/2N$ , does not introduce any contribution to the second-order correction for the energy. In this expression only the correlation term  $U\hat{n}_{i\uparrow}\hat{n}_{i\downarrow}$ , not diagonal in the  $k$  basis, contributes to the energy correction at second-order.

We write the non-interacting state  $|n^{(0)}\rangle$  or  $|k^{(0)}\rangle$  as the direct product of up and down states

$$|n^{(0)}\rangle = |n_{\uparrow}^{(0)}\rangle |n_{\downarrow}^{(0)}\rangle, \quad (9)$$

$$|k^{(0)}\rangle = |k_{\uparrow}^{(0)}\rangle |k_{\downarrow}^{(0)}\rangle. \quad (10)$$

For the second-order correction Eq. (8) we need to compute

$$\begin{aligned} \langle k^{(0)} | \hat{H}_1 | n^{(0)} \rangle &= \langle k^{(0)} | U \sum_{i=1}^N \hat{n}_{i\uparrow} \hat{n}_{i\downarrow} | n^{(0)} \rangle \\ &= U \sum_{i=1}^N \langle k^{(0)} | \hat{n}_{i\uparrow} \hat{n}_{i\downarrow} | n^{(0)} \rangle \end{aligned} \quad (11)$$

Using Eqs. (9) and (10)

$$\begin{aligned} \langle k^{(0)} | \hat{H}_1 | n^{(0)} \rangle &= U \sum_{i=1}^N \langle k_{\downarrow}^{(0)} | \langle k_{\uparrow}^{(0)} | \hat{n}_{i\uparrow} \hat{n}_{i\downarrow} | n_{\uparrow}^{(0)} \rangle | n_{\downarrow}^{(0)} \rangle \\ &= U \sum_{i=1}^N \langle k_{\uparrow}^{(0)} | \hat{n}_{i\uparrow} | n_{\uparrow}^{(0)} \rangle \langle k_{\downarrow}^{(0)} | \hat{n}_{i\downarrow} | n_{\downarrow}^{(0)} \rangle \end{aligned} \quad (12)$$

Evaluating one of these mean values for the generic spin variable  $\sigma$  we have

$$\langle k_{\sigma}^{(0)} | \hat{n}_{\sigma} | n_{\sigma}^{(0)} \rangle = (\langle 0 | \prod_{q \in S_{k,\sigma}} \hat{c}_{q\sigma} \hat{c}_{i\sigma}^{\dagger} \hat{c}_{i\sigma} ( \prod_{q' \in S_{n,\sigma}} \hat{c}_{q'\sigma}^{\dagger} | 0 \rangle).$$

Using Eq. (4) we write this expression as

$$\begin{aligned}\langle k_\sigma^{(0)} | \hat{n} | n_\sigma^{(0)} \rangle &= \langle 0 | \prod_{q \in S_{k,\sigma}} \hat{c}_{q\sigma} \sum_{pp'} \beta_{p'\sigma i} \beta_{p\sigma i}^* \hat{c}_{p\sigma}^\dagger \hat{c}_{p'\sigma} \prod_{q' \in S_{n,\sigma}} \hat{c}_{q'\sigma}^\dagger | 0 \rangle \\ &= \sum_{pp'} \beta_{p'\sigma i} \beta_{p\sigma i}^* \langle 0 | \prod_{q \in S_{k,\sigma}} \hat{c}_{q\sigma} \hat{c}_{p\sigma}^\dagger \hat{c}_{p'\sigma} \prod_{q' \in S_{n,\sigma}} \hat{c}_{q'\sigma}^\dagger | 0 \rangle.\end{aligned}\quad (13)$$

For this mean value to be different from zero in any case  $p'$  must belong to  $S_n$  and there are two possibilities for  $p$ :

- $p = p'$  implying that  $S_{k,\sigma} = S_{n,\sigma}$  so  $\langle k_\sigma^{(0)} | = \langle n_\sigma^{(0)} |$ . The Eq. (14) then resumes to

$$\sum_{p=p' \in S_{n,\sigma}} |\beta_{p\sigma i}|^2 = \langle n_\sigma^{(0)} | \hat{n}_{i\sigma} | n_\sigma^{(0)} \rangle = \langle \hat{n}_{i\sigma} \rangle \quad (14)$$

and the energy of the state  $|k_\sigma^{(0)}\rangle$  is  $E_{k\sigma}^{(0)} = E_{n\sigma}^{(0)} = \langle n_\sigma^{(0)} | \hat{H}_0 | n_\sigma^{(0)} \rangle$ .

- If  $p \neq p'$ , then  $p$  must not belong to  $S_{n\sigma}$ . Then Eq. (14) becomes

$$\langle k_\sigma^{(0)} | \hat{n}_\sigma | n_\sigma^{(0)} \rangle = \beta_{p'\sigma i} \beta_{p\sigma i}^* \quad (15)$$

and  $S_{k,\sigma}$  must contains all the elements of  $S_{n,\sigma}$  that include  $p$  and exclude  $p'$ . The energy of the state  $|k_\sigma^{(0)}\rangle$  is  $E_{k\sigma}^{(0)} = E_{n\sigma}^{(0)} + \varepsilon_{p\sigma} - \varepsilon_{p'\sigma}$ .

The condition  $|k^{(0)}\rangle \neq |n^{(0)}\rangle$  can be written as  $|k_\uparrow^{(0)}\rangle |k_\downarrow^{(0)}\rangle \neq |n_\uparrow^{(0)}\rangle |n_\downarrow^{(0)}\rangle$ . This last condition can be satisfied in three cases

- I .  $|k_\uparrow^{(0)}\rangle \neq |n_\uparrow^{(0)}\rangle \wedge |k_\downarrow^{(0)}\rangle \neq |n_\downarrow^{(0)}\rangle$
- II .  $|k_\uparrow^{(0)}\rangle \neq |n_\uparrow^{(0)}\rangle \wedge |k_\downarrow^{(0)}\rangle = |n_\downarrow^{(0)}\rangle$
- III .  $|k_\uparrow^{(0)}\rangle = |n_\uparrow^{(0)}\rangle \wedge |k_\downarrow^{(0)}\rangle \neq |n_\downarrow^{(0)}\rangle$

Taking into considerations these possibilities Eq. (8) becomes

$$\lambda^2 \beta = U^2 (\beta_0 + \beta_\uparrow + \beta_\downarrow) \quad (16)$$

where  $\beta_0$  is the term obtained when  $|k_\uparrow^{(0)}\rangle \neq |n_\uparrow^{(0)}\rangle$  and  $|k_\downarrow^{(0)}\rangle \neq |n_\downarrow^{(0)}\rangle$

$$\begin{aligned}\beta_0 &= \sum_{i,j} \sum_{\substack{p'_\uparrow \in S_{n\uparrow}, p'_\downarrow \in S_{n\downarrow} \\ p_\uparrow \notin S_{n\uparrow}, p_\downarrow \notin S_{n\downarrow}}} \frac{\beta_{p'_\uparrow j}^* \beta_{p_\uparrow j} \beta_{p'_\downarrow j}^* \beta_{p_\downarrow j} \beta_{p'_\uparrow i}^* \beta_{p_\uparrow i} \beta_{p'_\downarrow i}^* \beta_{p_\downarrow i}}{\varepsilon_{p_\uparrow} + \varepsilon_{p_\downarrow} - \varepsilon_{p'_\uparrow} - \varepsilon_{p'_\downarrow}} \\ &= \sum_{\substack{p'_\uparrow \in S_{n\uparrow}, p'_\downarrow \in S_{n\downarrow} \\ p_\uparrow \notin S_{n\uparrow}, p_\downarrow \notin S_{n\downarrow}}} \frac{\left[ \sum_j \beta_{p'_\uparrow j}^* \beta_{p_\uparrow j} \beta_{p'_\downarrow j}^* \beta_{p_\downarrow j} \right]^2}{\varepsilon_{p_\uparrow} + \varepsilon_{p_\downarrow} - \varepsilon_{p'_\uparrow} - \varepsilon_{p'_\downarrow}}.\end{aligned}\quad (17)$$

$\beta_{\uparrow}$  is the term obtained when  $|k_{\uparrow}^{(0)}\rangle \neq |n_{\uparrow}^{(0)}\rangle$  and  $|k_{\downarrow}^{(0)}\rangle = |n_{\downarrow}^{(0)}\rangle$

$$\begin{aligned}\beta_{\uparrow} &= \sum_{i,j} \sum_{\substack{p'_{\uparrow} \in S_{n_{\uparrow}} \\ p_{\uparrow} \notin S_{n_{\uparrow}}}} \frac{\beta_{p'_{\uparrow},j}^* \beta_{p_{\uparrow},j} \beta_{p'_{\uparrow},i}^* \beta_{p_{\uparrow},i} \langle \hat{n}_{j\downarrow} \rangle \langle \hat{n}_{i\downarrow} \rangle}{\varepsilon_{p_{\uparrow}} - \varepsilon_{p'_{\uparrow}}} \\ &= \sum_{\substack{p'_{\uparrow} \in S_{n_{\uparrow}} \\ p_{\uparrow} \notin S_{n_{\uparrow}}}} \frac{[\sum_j \beta_{p'_{\uparrow},j}^* \beta_{p_{\uparrow},j} \langle \hat{n}_{j\downarrow} \rangle]^2}{\varepsilon_{p_{\uparrow}} - \varepsilon_{p'_{\uparrow}}}\end{aligned}\tag{18}$$

$\beta_{\downarrow}$  is completely analogous to  $\beta_{\uparrow}$ .

$$\beta_{\downarrow} = \sum_{\substack{p'_{\downarrow} \in S_{n_{\downarrow}} \\ p_{\downarrow} \notin S_{n_{\downarrow}}}} \frac{[\sum_j \beta_{p'_{\downarrow},j}^* \beta_{p_{\downarrow},j} \langle \hat{n}_{j\downarrow} \rangle]^2}{\varepsilon_{p_{\downarrow}} - \varepsilon_{p'_{\downarrow}}}\tag{19}$$

The last four equations give the second-order perturbation correction to the energy of the state  $|n^{(0)}\rangle$  due to  $\hat{H}_1$ .

A Maxima [5] script to perform these calculations is found in supplementary material (2), the executable script is made available on requesting to the authors.

- 
- [1] D. Khomskii, *Basic Aspects of the Quantum Theory of Solids: Order and Elementary Excitations* (Cambridge University Press, 2010).
  - [2] J. Sakurai and J. Napolitano, *Modern Quantum Mechanics*, 2nd ed. (Addison-Wesley, 2011).
  - [3] P. Jørgensen and J. Simons, in *Second Quantization-Based Methods in Quantum Chemistry*, (Academic Press, 1981) pp. 169 – 172.
  - [4] J. Hubbard, in *Proceedings of the Royal Society of London A: Mathematical, Physical and Engineering Sciences*, Vol. 276 (The Royal Society, 1963) pp. 238–257.
  - [5] Maxima Open-source Computer Algebra Systems Maxima; software available at <http://maxima.sourceforge.net>.
